# Supplementary material for: Embryonic Stem Cell Differentiation to Functional Arterial Endothelial Cells through Sequential Activation of ETV2 and NOTCH1 Signaling by HIF1α
Source: PubMed Central journal article supplement (PMC5599266; doi:10.1016/j.stemcr.2017.07.001), 2017-08-03
Supplement: mmc2.pdf [file mmc2.pdf]

# Embryonic Stem Cell Differentiation to Functional Arterial Endothelial Cells through Sequential Activation of ETV2 and NOTCH1 Signaling by HIF1 $\alpha$

Kit Man Tsang,<sup>1,2</sup> James S. Hyun,<sup>1,2</sup> Kwong Tai Cheng,<sup>1</sup> Micaela Vargas,<sup>1</sup> Dolly Mehta,<sup>1</sup> Masuko Ushio-Fukai,<sup>1</sup> Li Zou,<sup>1</sup> Kostandin V. Pajcini,<sup>1</sup> Jalees Rehman,<sup>1,\*</sup> and Asrar B. Malik<sup>1,\*</sup>

<sup>1</sup>Department of Pharmacology and the Center for Lung and Vascular Biology, University of Illinois College of Medicine, 835 S. Wolcott, Chicago, IL 60612, USA

<sup>2</sup>Co-first author

\*Correspondence: [jalees@uic.edu](mailto:jalees@uic.edu) (J.R.), [abmalik@uic.edu](mailto:abmalik@uic.edu) (A.B.M.)

<http://dx.doi.org/10.1016/j.stemcr.2017.07.001>

## SUMMARY

The generation of functional arterial endothelial cells (aECs) from embryonic stem cells (ESCs) holds great promise for vascular tissue engineering. However, the mechanisms underlying their generation and the potential of aECs in revascularizing ischemic tissue are not fully understood. Here, we observed that hypoxia exposure of mouse ESCs induced an initial phase of HIF1 $\alpha$ -mediated upregulation of the transcription factor *Etv2*, which in turn induced the commitment to the EC fate. However, sustained activation of HIF1 $\alpha$  in these EC progenitors thereafter induced NOTCH1 signaling that promoted the transition to aEC fate. We observed that transplantation of aECs mediated arteriogenesis in the mouse hindlimb ischemia model. Furthermore, transplantation of aECs in mice showed engraftment in ischemic myocardium and restored cardiac function in contrast to ECs derived under normoxia. Thus, HIF1 $\alpha$  activation of *Etv2* in ESCs followed by NOTCH1 signaling is required for the generation aECs that are capable of arteriogenesis and revascularization of ischemic tissue.

## INTRODUCTION

Stabilization of the transcription factor hypoxia-inducible factor 1 $\alpha$  (HIF1 $\alpha$ ) in response to hypoxia induces expression of downstream targets regulating vasculogenesis, angiogenesis, and arteriogenesis (Semenza and Wang, 1992) (Bosch-Marce et al., 2007; Wang and Semenza, 1995). *Hif1 $\alpha$ <sup>-/-</sup>* mice are embryonically lethal whereas *Hif1 $\alpha$*  heterozygotes (*Hif1 $\alpha$ <sup>+/-</sup>*), although viable, are defective in expressing the angiogenic factor vascular endothelial growth factor (VEGF) and fail to induce adaptive arteriogenesis in the mouse hindlimb ischemia model (Bosch-Marce et al., 2007). Hypoxia participates in the EC fate commitment of ESCs (Kusuma et al., 2014; Prado-Lopez et al., 2010). Studies showed that hypoxia-primed embryoid bodies more efficiently differentiated into ECs than normoxic bodies (Lee et al., 2012). Multiple mechanisms are thought to be involved in the generation of ECs. Hypoxia increases the production of VEGF, basic fibroblast growth factor (bFGF), angiopoietin-1, and platelet-derived growth factor, all of which are linked to EC generation (Shin et al., 2011). Another mechanism of EC generation involves the induction of the Notch ligand *Dll4* and Notch target genes *Hey1* and *Hey2* (Diez et al., 2007). Studies in zebrafish and mice showed that activation of Notch signaling was critical for specifying arterial EC (aEC) fate differentiation during embryogenesis (Lawson et al., 2001, 2002). Ets transcriptional factor family members can also regulate vasculogenesis and angiogenesis (Oikawa and Yamada, 2003; De Val and Black, 2010) (Abedin et al., 2014) (Shi et al., 2014),

indicative of their role in specifying EC fate. Deletion of the Ets family member *Etv2* in particular impaired vasculogenesis in mice (Lee et al., 2009). Studies showed that *Etv2* activation functioned through the expression of *Dll4*, and thus contributed to aEC differentiation (Wythe et al., 2013).

While HIF-1 $\alpha$  and ETV2 signaling induce differentiation of ESCs to ECs, the mechanisms specifying the differentiation to aECs and whether aEC generation requires sequential activation of a specific set of signaling pathways have not been addressed. Here, we demonstrate that hypoxia-mediated EC differentiation from ESCs occurs in a biphasic manner, initially inducing HIF1 $\alpha$ -dependent *Etv2* activation that promotes ESC commitment to the EC lineage and then directing EC progenitors to the aEC fate via activation of NOTCH1 signaling. Upon transplantation, aECs were capable of inducing arteriogenesis in the mouse hindlimb ischemia model as well as engrafting and restoring the function of ischemic myocardium in mice. Thus, activation of the HIF1 $\alpha$ -ETV2-NOTCH1 signaling axis in ESCs is an essential mechanism of differentiation to aECs that are capable restoring arterial perfusion and function of ischemic tissue.

## RESULTS

### Hypoxia Enhances Endothelial Cell Generation from ESCs

Mouse ESCs (mESCs) were differentiated to ECs using bone morphogenetic protein 4, bFGF, and VEGF in either 1% O<sub>2</sub>

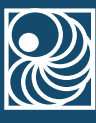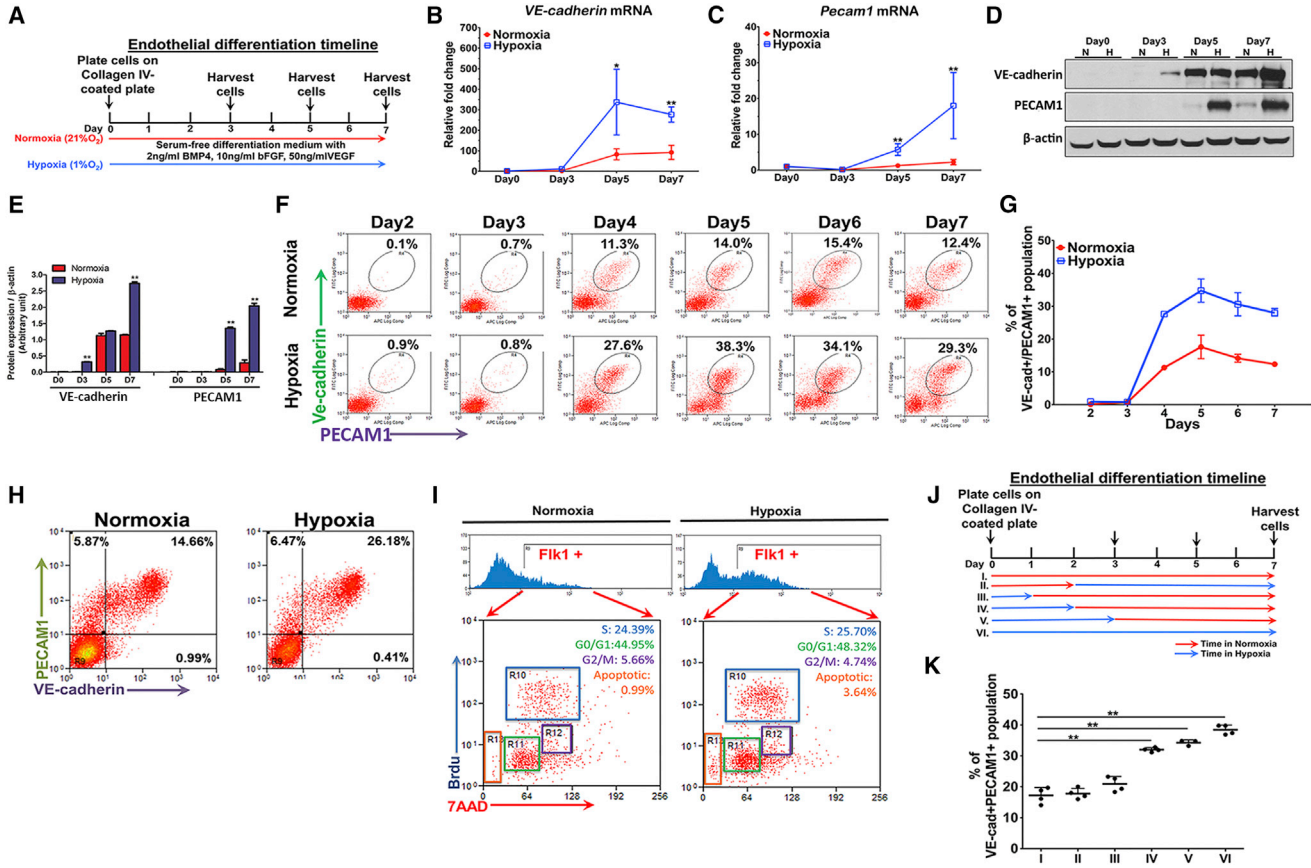

**Figure 1. Hypoxia Induces ESC Differentiation to Endothelial Cell Fate**

(A) Schematic showing the timeline of EC differentiation protocol from mESCs. (B and C) mRNA expression of *VE-cadherin* and *Pecam1* detected by real-time PCR on days 0, 3, 5, and 7 during differentiation (n = 3 independent experiments). (D and E) Representative immunoblot and protein quantification of VE-cadherin and PECAM1 on days 0, 3, 5, and 7 of endothelial differentiation (n = 3 independent experiments). (F and G) Increased percentage of VE-cadherin<sup>+</sup>/PECAM1<sup>+</sup> population was detected by flow cytometry at day 4 to day 7 under hypoxia (1% O<sub>2</sub>) Data shown as percentage of VE-cadherin<sup>+</sup>/PECAM1<sup>+</sup> population in normoxia and hypoxic differentiation (n = 3 independent experiments). (H) Enhanced VE-cadherin<sup>+</sup>/PECAM1<sup>+</sup> population at day 8 of endothelial differentiation from hESCs under hypoxia stimulus (n = 3 independent experiments). (I) Cell-cycle analysis of FLK1<sup>+</sup> endothelial progenitor cells derived during normoxia; hypoxia did not augment proliferation of differentiating cells (n = 3 independent experiments). (J and K) Diagram and statistical analysis demonstrating the six conditions used to test the importance of short and early hypoxic exposure in mediating of EC differentiation. Red arrows indicate the duration of normoxic period; Blue arrows indicate the duration of hypoxic period. Doubling of VE-cadherin<sup>+</sup>/PECAM1<sup>+</sup> ECs as determined by flow cytometry at day 7 of differentiation after a 2-day period of hypoxia (condition IV) when compared with normoxia (condition I). Note that a 3-day period of hypoxic exposure (condition V) was as effective in generating ECs as a full 7 days of hypoxia (condition VI) (n = 4 independent experiments). Data are shown as means ± SD. \*p ≤ 0.05, \*\*p ≤ 0.01.

or 21% O<sub>2</sub> conditions (Figure 1A). ECs were identified by cell-surface expression of VE-cadherin and PECAM1. Both mRNA and protein levels of these markers were significantly greater in the hypoxic cells at day 5 and day 7 of differentiation than in ESCs differentiated under normoxia (Figures 1B–1E). We found by flow cytometry that hypoxia

doubled the generation VE-cadherin<sup>+</sup>/PECAM1<sup>+</sup> cells compared with normoxia cells (Figures 1F and 1G). The enhanced generation of ECs during hypoxic differentiation of mESCs was also seen using human ESCs (hESCs) (Figure 1H). We next performed a bromodeoxyuridine (BrdU) assay to determine whether the ECs generated

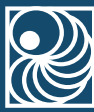

under hypoxia were due to increased proliferation or differentiation. As shown in [Figure 1I](#), hypoxia did not augment proliferation of differentiating cells, indicating that the increase in ESC-derived ECs could not be attributed to increased proliferation of ECs.

We also addressed whether duration of hypoxia exposure per se was a requirement in mediating EC differentiation ([Figures 1J and 1K](#)). Here we determined the effects of (I) continuous normoxia for 7 days, (II) 2 days of normoxia followed by 5 days of hypoxia, (III) 1 day of hypoxia followed by 6 days of normoxia, (IV) 2 days of hypoxia followed by 5 days of normoxia, (V) 3 days of hypoxia followed by 4 days of normoxia, and (VI) 7 days of continuous hypoxia. We observed that a minimum of 2 days of hypoxic exposure was required to increase EC differentiation from ESCs ([Figure 1K](#)). Importantly, the initiation of hypoxia after the 2-day period of normoxia failed to increase EC generation, indicating an early 2-day window during differentiation when hypoxia was critical for the augmentation of EC generation.

### HIF1 $\alpha$ Signaling and Early-Onset *Etv2* Expression Mediates Endothelial Cell Commitment

To test the role of HIF signaling in endothelial differentiation of mESCs, we first determined the expression levels of HIF1 $\alpha$  and HIF2 $\alpha$  in mESCs differentiated under hypoxic and normoxic conditions. We observed that HIF1 $\alpha$  but not HIF2 $\alpha$  was upregulated during the early phase of EC differentiation under hypoxia ([Figures 2A and 2B](#)). HIF1 $\alpha$  activation was characterized by the upregulation of its target genes, which regulate glycolysis such as the glucose transporter (*GLUT1*), isoforms of pyruvate dehydrogenase kinase (*PDK1*, 3, 4) and lactate dehydrogenase (*LDH-A*) ([Schödel et al., 2011; Semenza, 2003](#)). We therefore assessed the expression of these metabolic genes and found their upregulation, consistent with increased HIF1 $\alpha$  activation ([Figure S1](#)). Moreover, *Hif1 $\alpha$*  deletion using CRISPR prevented the augmentation of differentiation into ECs ([Figures 2C, 2D, and S2](#)). We next addressed whether the early response was the result of HIF1 $\alpha$ -mediated expression of Ets transcription factors known to regulate EC differentiation ([Dejana et al., 2007; Marcelo et al., 2013; De Val and Black, 2010](#)). We observed using a qPCR screen that the Ets factor *Etv2* was the most prominently upregulated isoform in ESCs undergoing differentiation during hypoxia ([Figure 2E](#)). *Etv2* expression under hypoxia was increased 7-fold at 2–3 days of hypoxia compared with normoxia ([Figure 2F](#)). Immunofluorescence also showed nuclear translocation of ETV2 in the hypoxia-exposed cells during this period ([Figure 2G](#)). The *Etv2* response during hypoxia was, however, short-lived as it sharply decreased at day 5 to the levels seen in normoxic cells ([Figure 2F](#)).

Using the chromatin immunoprecipitation assay, we determined the role of HIF1 $\alpha$  in regulating *Etv2* expression. We observed the binding of HIF1 $\alpha$  to the *Etv2* promoter during hypoxia ([Figure 2H](#)). Deletion of *Hif1 $\alpha$*  prevented *Etv2* expression ([Figure 2I](#)). To determine whether *Etv2* acted downstream of *Hif1 $\alpha$* , we generated *Etv2*<sup>-/-</sup> mESCs. Deletion of *Etv2* in mESCs during hypoxia reduced EC differentiation by 6-fold ([Figures 2J and 2K](#)) without a reduction in *Hif1 $\alpha$*  expression ([Figure S3](#)). Thus, HIF1 $\alpha$  binding to *Etv2* promoter and *Etv2* expression were required for hypoxia-induced enhancement of EC progenitor differentiation.

### HIF1 $\alpha$ Signaling Directs Specification to Arterial Endothelial Cell Fate

We next addressed maturation of EC progenitors under sustained hypoxia stimulus. Here we followed the aEC markers *Ephb2*, *Notch1*, and *Dll4* ([Duarte et al., 2004; Gerety et al., 1999; Krebs et al., 2000; Shutter, 2000](#)) and venous EC (vEC) marker *Couptfii* ([You et al., 2005](#)). We observed by qPCR that the expression of aEC markers *EphrinB2*, *Notch1*, and *Dll4* ([Park et al., 2013; Swift and Weinstein, 2009](#)) increased between days 3 and 7 of hypoxia ([Figure 3A](#)). The increase in these markers was mirrored by decreased *Etv2* levels on day 5 ([Figure 2F](#)), consistent with a maturation of ECs during the continuing hypoxia. In contrast to aEC markers, expression of vEC marker *Couptfii* was lower in hypoxic cells ([Figure 3B](#)). We also observed, importantly, that deletion of either *Hif1 $\alpha$*  or *Etv2* prevented the generation of aECs ([Figure 3C](#)).

We next determined whether hypoxia enhanced aEC specification through NOTCH1 signaling. Here we observed that *Notch1*<sup>-/-</sup> ESCs failed to augment aEC differentiation during hypoxia as evidenced by no increase in the aECs markers CXCR4, NOTCH1, and EPHB2 ([Figure 3D](#)). Importantly, *Notch1* deletion in mESCs did not suppress hypoxia-induced EC progenitor differentiation ([Figure 3E](#)), indicating that NOTCH1 only regulated aEC lineage commitment and not the initial phase of endothelial differentiation.

### aEC Transplantation Induces Arteriogenesis and Restores Cardiac Function Post Infarction

To determine whether hypoxia-derived aECs could induce arteriogenesis and were efficacious compared with normoxia-derived ECs when transplanted in ischemic tissue, we utilized the mouse hindlimb ischemia model ([Urao et al., 2008](#)) and a mouse myocardial infarction model ([Mavrommatis et al., 2013](#)). To track the injected cells, we generated an mESC reporter line using CRISPR/Cas9 to incorporate the GFP gene within exon 1 of *Pecam1* gene; GFP expression in these cells therefore marked the

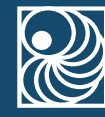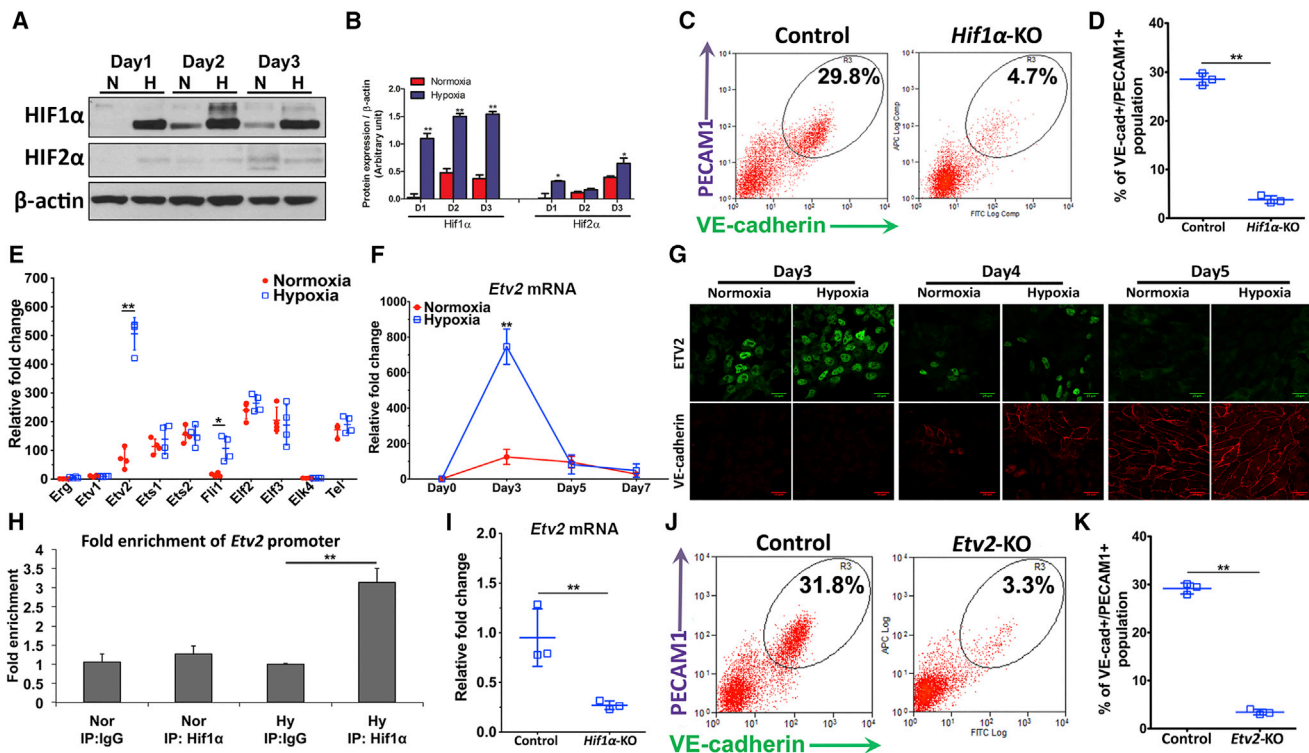

**Figure 2. HIF1 $\alpha$  Upregulates *Etv2* Expression and Augments Differentiation Endothelial Cell Progenitors**

(A and B) Protein expression of HIF1 $\alpha$  and HIF2 $\alpha$  on day 1 to day 3 of total population under differentiation. Early protein stabilization of HIF1 $\alpha$  was sustained from day 1 to day 3 under hypoxia stimulation (n = 4 independent experiments). (C and D) *Hif1 $\alpha$ <sup>-/-</sup>* mESCs were obtained using CRISPR/Cas9 with *Hif1 $\alpha$* -specific gRNA. Percentage of VE-cadherin<sup>+</sup>/PECAM1<sup>+</sup> population was significantly decreased in *Hif1 $\alpha$ <sup>-/-</sup>* mESCs compared with control mESCs (n = 3 independent experiments). (E) mRNA expression of 10 Ets family members were screened at day 3 of differentiation. Only *Etv2* and *Fli1* were significantly increased during hypoxia (n = 4 independent experiments). (F) Time course of changes in mRNA expression of *Etv2* demonstrated that hypoxia-induced early expression of *Etv2* as opposed to normoxia (n = 3 independent experiments). (G) Representative protein expression of ETV2 detected by immunofluorescence indicate ETV2 expression and nuclear localization at day 3, which declined by day 4 and disappeared by day 5 of differentiation (n = 3 independent experiments). (H) Enrichment of *Etv2* promoter using anti-HIF1 $\alpha$  antibody in a chromatin immunoprecipitation (IP) assay shows binding of HIF1 $\alpha$  to *Etv2* promoter (n = 3 independent experiments). IgG, immunoglobulin G. (I) Knockout of *Hif1 $\alpha$*  reduced expression of *Etv2* at day 3 of hypoxic differentiation (n = 3 independent experiments). (J and K) *Etv2<sup>-/-</sup>* mESCs were obtained using CRISPR/Cas9 with *Etv2*-specific gRNA (J). Percentage of VE-cadherin<sup>+</sup>/PECAM1<sup>+</sup> population was significantly decreased in *Etv2<sup>-/-</sup>* mESCs when compared with control. (K) Percentage of VE-cadherin<sup>+</sup>/PECAM1<sup>+</sup> cells on day-7 hypoxic EC differentiation of *Etv2<sup>-/-</sup>* mESCs (n = 3 independent experiments). Data are shown as means  $\pm$  SD. \*p  $\leq$  0.05, \*\*p  $\leq$  0.01.

generation of ECs following the 7-day differentiation conditions and allowed us to track the fate of the cells following cell transplantation *in vivo*. We observed by flow cytometry that 90% of the GFP<sup>+</sup> cells co-stained with anti-PECAM1 and anti-VE-cadherin antibodies (Figure S4), thus validating the EC reporter. ECs (1  $\times$  10<sup>6</sup>) generated under normoxia and hypoxia were transplanted into ischemic hindlimbs following femoral artery ligation. We observed markedly improved blood flow recovery on day 7 in the hindlimbs receiving aECs compared with nor-

moxia-derived ECs (Figure 4F). Further analysis of the gastrocnemius muscle on day 28 revealed an increased number of PECAM1<sup>+</sup> blood vessels in ischemic tissue transplanted with aECs, helping to explain the increased perfusion seen on day 7 (Figure 4G). We also compared the differential therapeutic efficacy of ECs generated in normoxic and hypoxic condition on cardiac function following myocardial infarction by implanting 5  $\times$  10<sup>5</sup> cells into infarcted mouse hearts. Echocardiography of mice transplanted with normoxia-derived GFP<sup>+</sup> ECs on

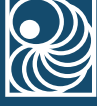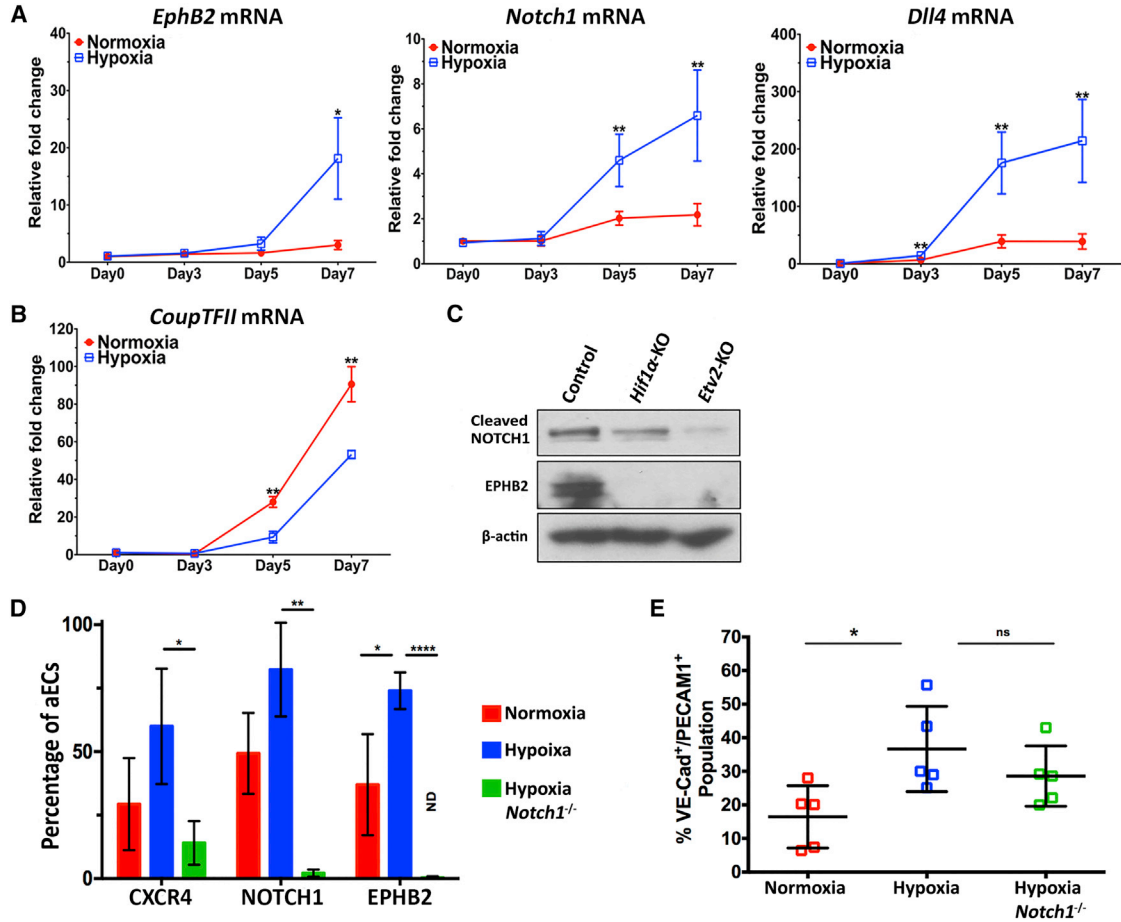

**Figure 3. HIF1α in the Second Phase Directs Differentiation of ESCs to Arterial EC Fate via NOTCH1 Signaling**

(A and B) mRNA expression of arterial EC markers *EphrinB2*, *Notch1*, and *Dll4*, and the venous EC marker *Coup-TFII* on days 0, 3, 5, and 7 of EC differentiation (n = 3 independent experiments). Results show preferential generation of aECs during hypoxia as opposed to venous-type ECs.

(C) Representative immunoblot of decreased expression of arterial EC markers EPHB2 and cleaved NOTCH1 in hypoxia-differentiated *Hif1α*<sup>-/-</sup> and *Etv2*<sup>-/-</sup> mESCs (n = 4 independent experiments).

(D) Percentage of arterial ECs in the endothelial differentiated pool at day 7. ECs were sorted by surface PECAM1 expression and analyzed for aEC markers CXCR4, NOTCH1, and EPHB2. Results show that hypoxic differentiation preferentially generates aECs and *Notch1* deletion ablates aEC formation (n = 3 independent experiments).

(E) Percentage of VE-cadherin<sup>+</sup>/PECAM1<sup>+</sup> endothelial progenitors differentiated from mESCs on day 7. Results show that deletion of *Notch1* in mESCs inhibit aEC formation but does not affect EC generation (n = 5 independent experiments).

Data are shown as means ± SD. \*p ≤ 0.05, \*\*p ≤ 0.01, \*\*\*\*p ≤ 0.0001; ns, not significant.

week1 showed modest improvement (Figures 4A and 4B). However, this improvement was transient as it was fully reversed by week 2 (Figure 4B). In sharp contrast, hypoxia-derived GFP<sup>+</sup> ECs significantly increased and sustained the improvement in cardiac function over 21-day study period (Figures 4A and 4B). Immunohistochemistry performed on serial sectioned hearts slides 21 days after surgery was used to visualize and quantitate the transplanted GFP<sup>+</sup> cells in relation to the surrounding vasculature. Although an identical number of normoxic and hypoxic

differentiated ECs were transplanted, a greater number of hypoxia-derived GFP<sup>+</sup> ECs persisted and showed increased engraftment in the host endothelium throughout the 21-day study period (Figures 4C and 4D). Further analysis of GFP<sup>+</sup> ECs in day 21 heart sections with the proliferation marker Ki-67 showed lower levels of proliferation in hypoxia-derived ECs (Figure 4D), suggesting that the increased engraftment and revascularization by hypoxia-derived ECs was due to their enhanced functional capacity and not to increased proliferation.

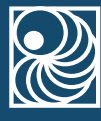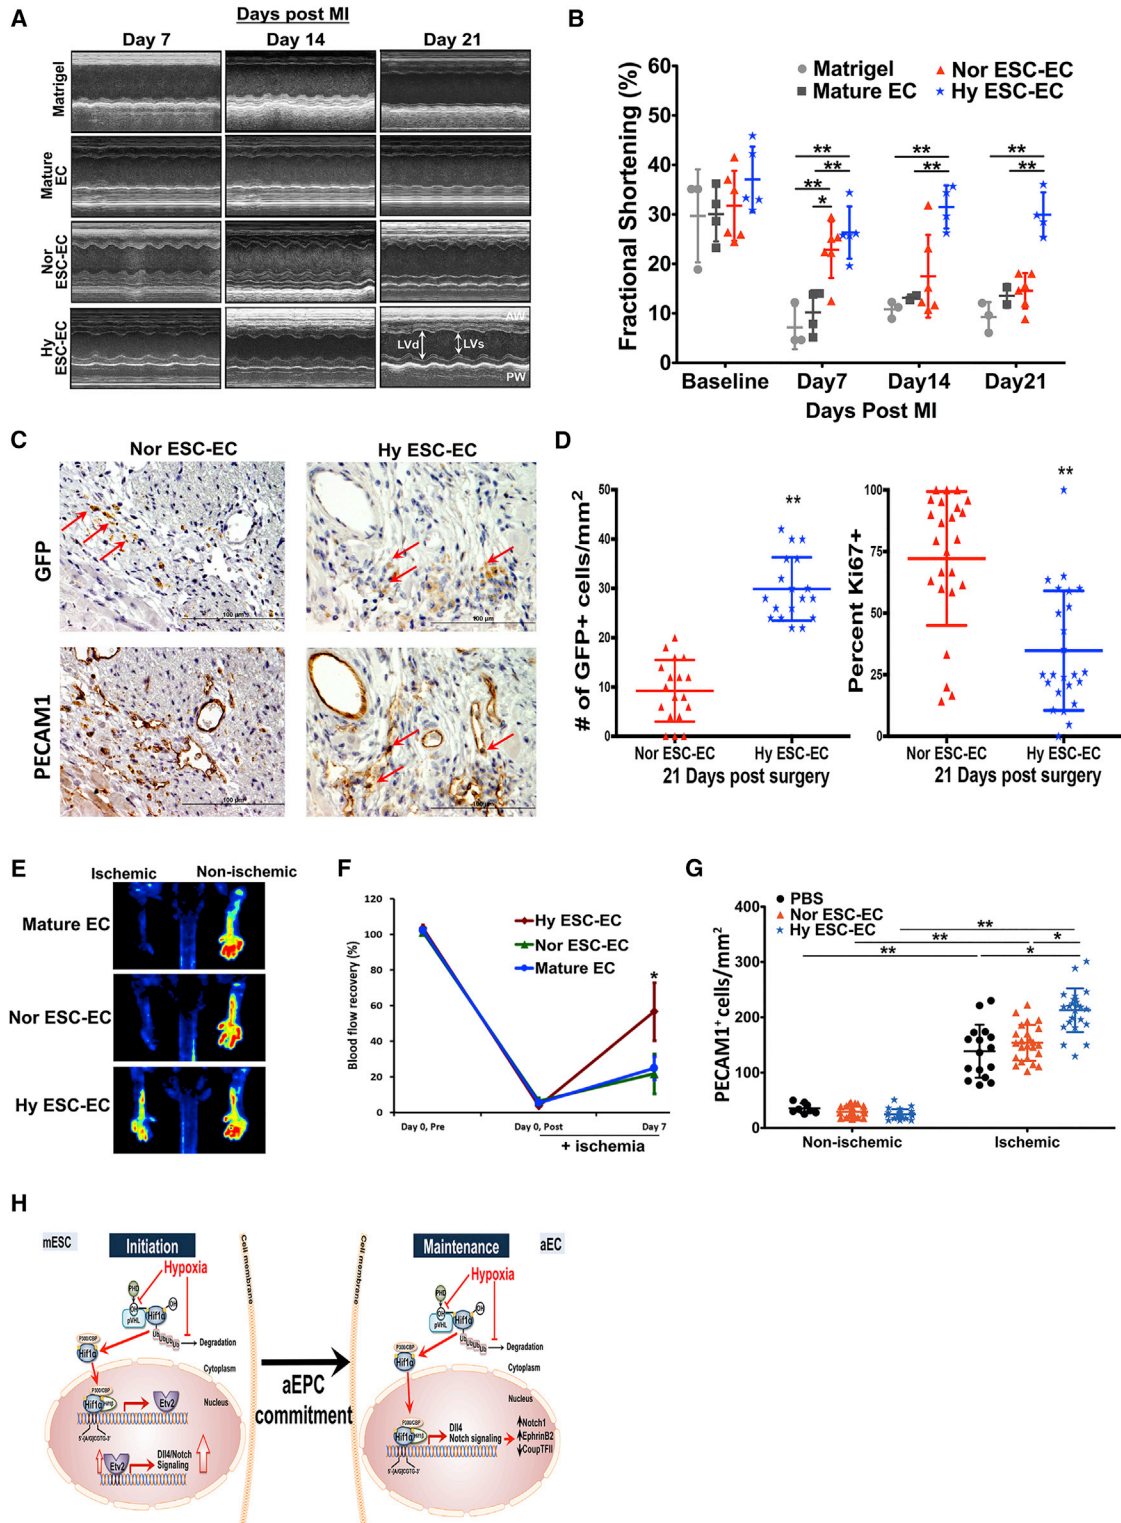

**Figure 4. Hypoxia-Derived ECs Improve Perfusion of Ischemic Hindlimb via Arteriogenesis and Cardiac Function after Myocardial Infarction in Mice**

(A) Representative M-mode echocardiographic views of infarcted mouse hearts 1 week, 2 weeks, and 3 weeks after induction of myocardial infarction; n = 3 in Matrigel group. n = 4 in mature EC group. n = 6 in normoxia-derived ESC-EC (Nor ESC-EC) group, and n = 5 in hypoxia-derived ESC-EC (Hy ESC-EC) group. LVD, left ventricular diastolic dimension; LVs, left ventricular systolic dimension.

(legend continued on next page)



## DISCUSSION

In this study, we demonstrate the biphasic and sequential role of HIF1 $\alpha$  signaling. HIF1 $\alpha$  first generates EC progenitors by upregulating the transcription factor *Etv2* and subsequently drives maturation to an aEC fate via a NOTCH1-dependent signaling mechanism. We also show that the hypoxia-induced augmentation of EC generation was due to enhanced differentiation and arterial fate commitment, as opposed to increased proliferation. Transplantation of aECs differentiated under hypoxia induced arteriogenesis in the mouse hindlimb ischemia model and engraftment of aECs coupled with improved function of infarcted mouse hearts.

The current model of arterial and venous specifications is VEGF-centric, whereby angioblasts exposed to increasing concentrations of VEGF adopt an aEC fate (Fish and Wythe, 2015). In the present study, we demonstrated that mESCs grown in hypoxia had a greater propensity to differentiate to aECs in the presence of high concentrations of VEGF than mESCs differentiated under normoxia. HIF1 $\alpha$  activation of *Etv2* and subsequently of NOTCH1 signaling was required for aEC generation. Interestingly, ESCs were most sensitive to hypoxia in the first 2 days of differentiation, suggesting the importance of an early hypoxia window in epigenetically imprinting ESCs for their subsequent aEC fate. Hypoxia during this phase may modify the epigenetic landscape through the expression of histone demethylases KDM4A and KDM4C, which were shown to be important for transitioning ESCs to ECs (Wu et al., 2015). Our observation that 2 days of hypoxia was required to specify the aEC fate is consistent with the expression of *KDM4A* and *KDM4C*, which peaked on days 2 and 5 during EC differentiation (Wu et al., 2015); that is, expression of

these histone demethylases occurred before the expression of *Etv2* in the present study. We also found that the hypoxia-differentiated ECs exhibited upregulation of the glycolytic genes, glucose transporter 1 (*Glut1*) and lactate dehydrogenase (*Ldha*). This may also contribute to subsequent endothelial differentiation, since ECs primarily rely on glycolysis to meet their ATP demands (Eelen et al., 2016).

Our results show that generation of aECs follows a distinct sequential process requiring initial HIF1 $\alpha$ -induced expression of *Etv2* to transition ESCs to EC progenitors followed by activation of NOTCH1 signaling that induces the generation of aECs. The decrease in *Etv2* expression interestingly preceded HIF1 $\alpha$ -induced expression of NOTCH1. The role of *Notch1* in generating aECs is consistent with NOTCH1's fundamental importance in arterial differentiation during embryonic development (Lawson et al., 2001). The changes in the expression of *Etv2* and subsequently in *Notch1* expression recapitulated those observed during embryonic arteriogenesis (Wythe et al., 2013); thus, hypoxia-induced ESC to aEC transition recapitulated the essential elements of arterial differentiation during embryonic vascular development.

*Etv2* is a developmental transcription factor mediating EC progenitor formation between embryonic days 7.5 and 9.5 in mice (Lee et al., 2009) (Ferdous et al., 2009). Upregulation of *Etv2* expression was required for the initiation of embryonic vasculogenesis; however, *Etv2* is subsequently downregulated prior to vessel maturation (Ferdous et al., 2009; Lee et al., 2009). We observed moderate upregulation and subsequent downregulation of *Etv2* during differentiation of ESCs into ECs under normoxia; however, the amplitude of temporal *Etv2* expression was markedly enhanced under hypoxic conditions and mirrored the *in vivo* *Etv2* expression pattern seen during embryonic

(B) Quantification of fractional shortening (%) calculated as  $([LVd - LVs]/LVd \times 100)$  in mice tested in (A). Mice injected with Hy ESC-EC showed sustained improvement of cardiac function (\* $p < 0.05$ , \*\* $p < 0.01$ ); results are shown as mean  $\pm$  SD.

(C) Representative images (40 $\times$ ) of serial heart sections (0.5  $\mu$ m apart) stained by immunochemistry for GFP<sup>+</sup> ECs and PECAM1 to identify host vasculature. Results indicate more hypoxia ESC-ECs than normoxia ESC-ECs engraftment within PECAM1-stained vessels (red arrows).

(D) Quantification and proliferation analysis of transplanted normoxia ESC-ECs and hypoxia ESC-ECs on 21-day infarcted hearts. Data were obtained from three animals and with at least six fields examined from each animal; results are shown as mean  $\pm$  SD (\*\* $p < 0.01$ ).

(E) Serial laser Doppler perfusion imaging analysis in ischemic and non-ischemic limbs of mice ( $n = 3$  mice per group).

(F) Quantification of hindlimb blood flow recovery determined by calculating ischemic/non-ischemic perfusion ratios before and after surgery. Beneficial effects of injected hypoxia ESC-ECs in ischemic-induced injury are clearly evident (\* $p < 0.05$ ); results are shown as mean  $\pm$  SD.

(G) Quantification of number of PECAM1<sup>+</sup> cells in gastrocnemius (GC) muscles of non-ischemic and ischemic hind limbs. Injection of hypoxia ESC-EC enhanced vessel regeneration after ischemia when compared with normoxia ESC-ECs (\* $p < 0.05$ , \*\* $p < 0.01$ ). Data were obtained from three mice and eight fields from each animal; results are shown as mean  $\pm$  SD.

(H) Model of generation of aECs under hypoxia. Under hypoxia, the stabilization of HIF1 $\alpha$  in mESCs in the initial phase leads to *de novo* expression of *Etv2* by binding to hypoxia response elements (HRE) within the *Etv2* promoter. *Etv2* expression augments EC commitment. Persistent stabilization of HIF1 $\alpha$  under hypoxia subsequently maintained the hypoxia response. HIF1 $\alpha$  is recruited to the HRE in promoter of *Dll4* and activates NOTCH1, resulting in commitment to arterial EC subtype via upregulation of EPHB2 as well as suppression of *CoupTFII*, which is restricted to venous-type ECs.

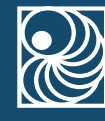

vasculogenesis (Ferdous et al., 2009) (Kataoka et al., 2011). Hypoxia-induced upregulation of *Etv2* expression also resulted in greater *Etv2* transcriptional activity as evidenced by hypoxia-induced increases in the expression of known ETV2 targets *Flk1*, *Pecam1*, and *VE-cadherin* (Kohler et al., 2013; Lee et al., 2009; De Val and Black, 2010). We observed that genetic deletion of *Etv2* in ESCs abrogated the hypoxia-induced EC generation, supporting the requisite role of *Etv2* during ESC to EC differentiation. Furthermore, deletion of *Hif1 $\alpha$*  in ESCs prevented both *Etv2* upregulation as well as EC differentiation. These data together demonstrate that HIF1 $\alpha$ -induced *Etv2* expression during the early phase of hypoxia is the primary determinant of mESC differentiation to EC progenitors.

Hypoxia acted in a biphasic manner during the endothelial differentiation program, first enhancing HIF1 $\alpha$ -ETV2-dependent generation of EC progenitors and then instructing these progenitors toward the aEC fate. As in the initial phase EC progenitor differentiation, the generation of aECs was also HIF1 $\alpha$  dependent. Stabilization of HIF1 $\alpha$  in the committed EC progenitors activated expression of *Notch1* and Notch ligand *Dll4*, known to be required for arterial differentiation during development (Lawson et al., 2001). We observed that deletion of *Hif1 $\alpha$*  significantly reduced EPHB2 expression, an aEC marker, indicating a requirement for persistent HIF1 $\alpha$  activity in the aEC specification mechanism. That HIF1 $\alpha$  signaling induced generation of EC progenitors via *Etv2* and subsequently aECs via *Notch1* is in agreement with studies showing that NOTCH1 signaling mediates arterial fate specification during development (Park et al., 2013; Shutter, 2000; Swift and Weinstein, 2009; You et al., 2005). Studies have also shown that vasculogenesis is initiated in *Dll4*<sup>-/-</sup> (Duarte et al., 2004), *Notch1*<sup>-/-</sup> (Krebs et al., 2000; Swiatek et al., 1994), and *Hey1*<sup>-/-</sup>/*Hey2*<sup>-/-</sup> mice (Fischer et al., 2004), but arterial blood vessels failed to form, consistent with the observed essential role of Notch signaling in aEC fate determination.

We observed that the levels of *EphB2*, *Notch1*, and *Dll4* remained elevated for the 7-day hypoxia period, whereas expression of the venous marker *CouptFII* was reduced during this period to the levels seen during normoxia. A possible explanation for this finding is that hypoxia-mediated upregulation of *Dll4* and *Hey2* leads to repression of *CouptFII* (Diez et al., 2007). Thus, sustained hypoxia in the present study induced activation of the DLL4-NOTCH-HEY2 signaling pathway, which in turn may repress *CouptFII* and thereby favor the generation of aECs.

Because aECs generated during hypoxia may be useful in revascularizing ischemic tissue, we assessed their capacity in two different ischemia models. We ensured that the same number of normoxia- or hypoxia-derived ECs was transplanted. In the mouse myocardial infarction model, transplantation of hypoxia-derived GFP<sup>+</sup> ECs resulted in

long-term persistence, indicating their engraftment in ischemic tissue and improved cardiac function following myocardial infarction. Furthermore, in the mouse hindlimb ischemia model, transplantation of hypoxia-derived ECs induced arteriogenesis and formed neovessels throughout the 28-day study period when compared with normoxia-derived ECs. As transport of oxygenated blood is an intrinsic behavior of arteries, the hypoxia-derived aECs appeared to be superior to the normoxia-derived cells in normalizing arterial perfusion. Ki-67<sup>+</sup> analysis of GFP<sup>+</sup> ECs in infarcted hearts 21 days after infarction showed hypoxia-derived ECs to be significantly less proliferative; thus, we attribute the increased perfusion and revascularization to the engraftment of aECs as opposed to proliferation of these cells per se. We cannot rule out the possibility that hypoxia-derived ESC-ECs may have demonstrated increased proliferation early on after the implantation which we could not detect; however, the lack of hypoxia-induced proliferation during the ESC-to-EC differentiation period prior to transplantation suggests that hypoxia does not augment ESC-EC proliferation. Another possibility for the long-term sequestration and functional improvement of aECs could be the enhanced survivability of the cells. As ischemic tissue presents a hypoxic environment and we showed (Figure S1) that cells undergoing hypoxic differentiation demonstrated significant increases in the expression of glycolytic genes, aECs may better tolerate the hypoxic environment of the ischemic tissue and thus be resilient to oxygen deprivation. A further indication that the hypoxia-derived aECs were indeed more angiogenic is evidenced by an increased number of new PECAM1<sup>+</sup> vessels formed in the gastrocnemius in mouse hindlimb after transplantation of aECs.

A limitation of our study is that the hypoxic differentiation not only generated the aEC population but also activated hypoxic pathways, which could itself enhance the therapeutic efficacy of the transplanted cells independent of their arterial fate. Thus, it is possible that release of paracrine factors also contributes to the improved perfusion. It has been previously shown that CD34<sup>+</sup>/VE-cadherin<sup>+</sup> cells derived from induced pluripotent stem cells release pro-angiogenic and anti-apoptotic factors (Gu et al., 2012), which may contribute to the recovery of cardiac function following myocardial infarction seen in the present study.

In conclusion, our results show the importance of hypoxic signaling in directing the sequential generation of EC progenitors to aECs. The first phase requires activation of HIF1 $\alpha$  to mediate the expression of *Etv2*, which specifies EC progenitor fate. Sustained HIF1 $\alpha$  activation also mediates the second phase resulting in expression of *Notch1*, which induces maturation of EC progenitors into aECs. These findings show a fundamental role for hypoxia signaling in aEC fate determination and points to an





innovative approach for enhancing therapeutic efficacy of ESC-derived aECs in revascularizing ischemic tissue.

## EXPERIMENTAL PROCEDURES

### mESC Culture and Endothelial Differentiation Protocol

J1 mESCs were cultured on a feeder layer of mouse embryonic fibroblasts. Prior to endothelial differentiation, cells were passaged onto 0.1% gelatin coated plates using the same medium. Undifferentiated H1 hESCs were cultured on Matrigel-coated plate with Essential 8 medium (Gibco). mESCs were seeded onto collagen IV-coated plates and maintained in endothelial cell differentiation medium for 7 days either under normoxia (21% O<sub>2</sub>) or hypoxia (1% O<sub>2</sub>). This differentiation protocol generates functional endothelial cells expressing endothelial transcription factors and endothelial-specific cell-surface markers such VE-cadherin, forming tubes *in vitro* and blood vessels *in vivo* (Toya et al., 2015). hESCs were seeded onto Matrigel-coated plates in Essential 8 medium and incubated for 24 hr (day 1). On the next day (day 0), Essential 8 medium was replaced with human endothelial cell differentiation medium and incubated for 3 days. At days 3, 5, and 7, the medium was replaced with serum-free differentiation medium supplemented with VEGF and SB431542 (Toya et al., 2015). Differentiated cells were collected on day 8 for analysis by flow cytometry.

### CRISPR/Cas9 Gene Deletion

mESCs were co-transfected with plasmids containing Cas9, *Hif1 $\alpha$* -specific guide RNA (gRNA) and GFP as well as homology-directed repaired plasmids containing homology arms corresponding to the cut sites generated by *Hif1 $\alpha$* -specific gRNA. GFP<sup>+</sup> mESCs were sorted and cultured under puromycin selection. HIF1 $\alpha$  protein expression of each clone was then assessed in hypoxia-exposed mESCs. An *Etv2*<sup>-/-</sup> mESC line was generated by transfecting px330 plasmid (Cong et al., 2013) containing gRNA targeting *Etv2*. Resultant single mESC colonies were then picked and expanded. Each clone was subjected to EC differentiation protocol and *Etv2* expression in each clone was determined on day 3 to validate gene knockout. *Notch1*<sup>-/-</sup> mESCs were also generated by co-transfecting px330 plasmid (Cong et al., 2013) containing *Notch1*-specific gRNA with a puromycin-containing plasmid. Individual colonies were expanded and *Notch1* deletion was validated by qPCR and western blot.

### *Pecam1*-GFP mESC Reporter Line

To track the fate of the injected cells *in vivo*, we generated a mESC reporter line using CRISPR/Cas9. GFP was incorporated within the exon 1 of *Pecam1* gene; GFP expression was driven by endogenous *Pecam1* promoter. The sequence of gRNA used for targeting mouse *Pecam1* locus was 5'-CAG CTG AGG TGG GCC TCA GT-3'.

### Cell-Cycle Analysis

BrdU labeling and flow cytometric quantification were used to determine proliferation of mESCs undergoing endothelial differentiation. FLK1 was used to gate for endothelial cells (Yamashita et al., 2000).

### Mouse Hindlimb and Cardiac Ischemia Models

The animal experiments were carried out according to approved protocols by the Animal Care Committee (ACC) at the University of Illinois, Chicago. *Pecam1*-driven GFP reporter mESC line was used to study the uptake of endothelial cells. At day 7 of endothelial differentiation, GFP<sup>+</sup> cells were sorted by fluorescence-activated cell sorting. For the mouse myocardial infarction model, C57/BL6 mice were subjected to left main coronary artery ligation to induce infarction as described by Mavrommatis et al. (2013). Immediately after ligation, hypoxia-derived ECs, normoxia-derived ECs, primary mouse adult ECs (negative control), or Matrigel was introduced by direct intramuscular injections into the perinfarcted regions of the myocardium. For the mouse hindlimb ischemia model, male athymic nude mice were subjected to unilateral hindlimb surgery as previously described (Urao et al., 2008). ESC-derived ECs or mature ECs were injected into three different spots in gastrocnemius muscles immediately after ischemic surgery. Ischemic (left)/non-ischemic (right) limb blood flow was measured using a laser Doppler blood flow analyzer as described by Urao et al. (2008).

### Statistical Analysis

All statistical analyses were performed with GraphPad Prism (GraphPad, San Diego). Results are expressed as mean  $\pm$  SD. Differences between groups were analyzed using ANOVA and Student's *t* test. *p* Values of less than 0.05 were considered statistically significant.

Full details of experiments are provided in Supplemental Experimental Procedures.

## SUPPLEMENTAL INFORMATION

Supplemental Information includes Supplemental Experimental Procedures, four figures, and one table and can be found with this article online at <http://dx.doi.org/10.1016/j.stemcr.2017.07.001>.

## AUTHOR CONTRIBUTIONS

K.M.T., D.M., J.R., and A.B.M. designed the experiments; K.M.T., J.S.H., K.T.C., M.V., and L.Z. performed the experiments; K.M.T., J.S.H., K.T.C., L.Z., K.V.P., and M.U.-F. analyzed data; K.M.T., J.S.H., J.R., and A.B.M. wrote the paper. All authors reviewed the manuscript and made revisions or edits.

## ACKNOWLEDGMENTS

This work was supported by NIH grants T32-HL007829, R01-HL090152, R01-HL118068, R01-GM094220, and P01-HL60678.

Received: February 15, 2017

Revised: June 30, 2017

Accepted: July 3, 2017

Published: August 3, 2017

## REFERENCES

Abedin, M.J., Nguyen, A., Jiang, N., Perry, C.E., Shelton, J.M., Watson, D.K., and Ferdous, A. (2014). *Fli1* acts downstream of *etv2* to

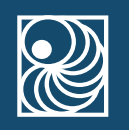

- govern cell survival and vascular homeostasis via positive autoregulation. *Circ. Res.* *114*, 1690–1699.
- Bosch-Marce, M., Okuyama, H., Wesley, J.B., Sarkar, K., Kimura, H., Liu, Y.V., Zhang, H., Strazza, M., Rey, S., Savino, L., et al. (2007). Effects of aging and hypoxia-inducible factor-1 activity on angiogenic cell mobilization and recovery of perfusion after limb ischemia. *Circ. Res.* *101*, 1310–1318.
- Cong, L., Ran, F.A., Cox, D., Lin, S., Barretto, R., Hsu, P.D., Wu, X., Jiang, W., and Marraffini, L.A. (2013). Multiplex genome engineering using CRISPR/VCas systems. *Science* *339*, 819–823.
- Dejana, E., Taddei, A., and Randi, A.M. (2007). Foxs and Ets in the transcriptional regulation of endothelial cell differentiation and angiogenesis. *Biochim. Biophys. Acta* *1775*, 298–312.
- Diez, H., Fischer, A., Winkler, A., Hu, C.J., Hatzopoulos, A.K., Breier, G., and Gessler, M. (2007). Hypoxia-mediated activation of Dll4-Notch-Hey2 signaling in endothelial progenitor cells and adoption of arterial cell fate. *Exp. Cell Res.* *313*, 1–9.
- Duarte, A., Hirashima, M., Benedito, R., Trindade, A., Diniz, P., Bekman, E., Costa, L., Henrique, D., and Rossant, J. (2004). Dosage-sensitive requirement for mouse Dll4 in artery development. *Genes Dev.* *18*, 2474–2478.
- Eelen, G., de Zeeuw, P., Simons, M., and Carmeliet, P. (2016). Endothelial cell metabolism in normal and diseased vasculature. *Circ. Res.* *116*, 1231–1244.
- Ferdous, A., Caprioli, A., Iacovino, M., Martin, C.M., Morris, J., Richardson, J.A., Latif, S., Hammer, R.E., Harvey, R.P., Olson, E.N., et al. (2009). Nkx2-5 transactivates the Ets-related protein 71 gene and specifies an endothelial/endocardial fate in the developing embryo. *Proc. Natl. Acad. Sci. USA* *106*, 814–819.
- Fischer, A., Schumacher, N., Maier, M., Sendtner, M., and Gessler, M. (2004). The Notch target genes Hey1 and Hey2 are required for embryonic vascular development. *Genes Dev.* *18*, 901–911.
- Fish, J.E., and Wythe, J.D. (2015). The molecular regulation of arteriovenous specification and maintenance. *Dev. Dyn.* *244*, 391–409.
- Gerety, S.S., Wang, H.U., Chen, Z.F., and Anderson, D.J. (1999). Symmetrical mutant phenotypes of the receptor EphB4 and its specific transmembrane ligand ephrin-B2 in cardiovascular development. *Mol. Cell* *4*, 403–414.
- Gu, M., Nguyen, P.K., Lee, A.S., Xu, D., Hu, S., Plews, J.R., Han, L., Huber, B.C., Lee, W.H., Gong, Y., et al. (2012). Microfluidic single-cell analysis shows that porcine induced pluripotent stem cell-derived endothelial cells improve myocardial function by paracrine activation. *Circ. Res.* *111*, 882–893.
- Kataoka, H., Hayashi, M., Nakagawa, R., Tanaka, Y., Izumi, N., Nishikawa, S., Jakt, M.L., Tarui, H., and Nishikawa, S. (2011). Etv2/ER71 induces vascular mesoderm from Flk1+ PDGFR $\alpha$ + primitive mesoderm. *Blood* *118*, 6975–6987.
- Kohler, E.E., Wary, K.K., Li, F., Chatterjee, I., Urao, N., Toth, P.T., Ushio-Fukai, M., Rehman, J., Park, C., and Malik, A.B. (2013). Flk1+ and VE-cadherin+ endothelial cells derived from iPSCs recapitulates vascular development during differentiation and display similar angiogenic potential as ESC-derived cells. *PLoS One* *8*, 1–13.
- Krebs, L.T., Xue, Y., Norton, C.R., Shutter, J.R., Maguire, M., Sundberg, J.P., Gallahan, D., Closson, V., Kitajewski, J., Callahan, R., et al. (2000). Notch signaling is essential for vascular morphogenesis in mice. *Genes Dev.* *14*, 1343–1352.
- Kusuma, S., Peijnenburg, E., Patel, P., and Gerecht, S. (2014). Low oxygen tension enhances endothelial fate of human pluripotent stem cells. *Arterioscler. Thromb. Vasc. Biol.* *34*, 913–920.
- Lawson, N.D., Scheer, N., Pham, V.N., Kim, C., Chitnis, A.B., Campos-Ortega, J.A., and Weinstein, B.M. (2001). Notch signaling is required for arterial-venous differentiation during embryonic vascular development. *Development* *128*, 3675–3683.
- Lawson, N.D., Vogel, A.M., and Weinstein, B.M. (2002). Sonic hedgehog and vascular endothelial growth factor act upstream of the Notch pathway during arterial endothelial differentiation. *Dev. Cell* *3*, 127–136.
- Lee, D., Park, C., Lee, H., Lugus, J.J., Kim, S.H., Arentson, E., Chung, Y.S., Gomez, G., Kyba, M., Lin, S., et al. (2009). ER71 acts downstream of BMP, Notch and Wnt signaling in blood and vessel progenitor specification. *Cell Stem Cell* *2*, 497–507.
- Lee, S.W., Jeong, H.K., Lee, J.Y., Yang, J., Lee, E.J., Kim, S.Y., Youn, S.W., Lee, J., Kim, W.J., Kim, K.W., et al. (2012). Hypoxic priming of mESCs accelerates vascular-lineage differentiation through HIF1-mediated inverse regulation of Oct4 and VEGF. *EMBO Mol. Med.* *4*, 924–938.
- Marcelo, K.L., Goldie, L.C., and Hirschi, K.K. (2013). Regulation of endothelial cell differentiation and specification. *Circ. Res.* *112*, 1272–1287.
- Mavrommatis, E., Shioura, K.M., Los, T., and Goldspink, P.H. (2013). The E-domain region of mechano-growth factor inhibits cellular apoptosis and preserves cardiac function during myocardial infarction. *Mol. Cell. Biochem.* *381*, 69–83.
- Oikawa, T., and Yamada, T. (2003). Molecular biology of the Ets family of transcription factors. *Gene* *303*, 11–34.
- Park, C., Kim, T.M., and Malik, A.B. (2013). Transcriptional regulation of endothelial cell and vascular development. *Circ. Res.* *112*, 1380–1400.
- Prado-Lopez, S., Conesa, A., Armiñán, A., Martínez-Losa, M., Escobedo-Lucea, C., Gandia, C., Tarazona, S., Melguizo, D., Blesa, D., Montaner, D., et al. (2010). Hypoxia promotes efficient differentiation of human embryonic stem cells to functional endothelium. *Stem Cells* *28*, 407–418.
- Schödel, J., Oikonomopoulos, S., Ragoussis, J., Pugh, C.W., Ratcliffe, P.J., and Mole, D.R. (2011). High-resolution genome-wide mapping of HIF-binding sites by ChIP-seq. *Blood* *117*, 207–218.
- Semenza, G.L. (2003). Targeting HIF-1 for cancer therapy. *Nat. Rev. Cancer* *3*, 721–732.
- Semenza, G.L., and Wang, G.L. (1992). A nuclear factor induced by hypoxia via *de novo* protein synthesis binds to the human erythropoietin gene enhancer at a site required for transcriptional activation. *Mol. Cell. Biol.* *12*, 5447–5454.
- Shi, X., Richard, J., Zirbes, K.M., Gong, W., Lin, G., Kyba, M., Thomson, J.A., Koyano-Nakagawa, N., and Garry, D.J. (2014). Cooperative interaction of Etv2 and Gata2 regulates the development of endothelial and hematopoietic lineages. *Dev. Biol.* *389*, 208–218.



- Shin, J.M., Kim, J., Kim, H.E., Lee, M.J., Lee, K.I., Yoo, E.G., Jeon, Y.J., Kim, D.W., Chae, J.I., and Chung, H.M. (2011). Enhancement of differentiation efficiency of hESCs into vascular lineage cells in hypoxia via a paracrine mechanism. *Stem Cell Res.* 7, 173–185.
- Shutter, J.R. (2000). Dll4, a novel Notch ligand expressed in arterial endothelium. *Genes Dev.* 14, 1313–1318.
- Swiatek, P.J., Lindsell, C.E., Del Amo, F.F., Weinmaster, G., and Gridley, T. (1994). Notch 1 is essential for postimplantation development in mice. *Genes Dev.* 8, 707–719.
- Swift, M.R., and Weinstein, B.M. (2009). Arterial-venous specification during development. *Circ. Res.* 104, 576–588.
- Toya, S.P., Wary, K.K., Mittal, M., Li, F., Toth, P.T., Park, C., Rehman, J., and Malik, A.B. (2015). Integrin  $\alpha 6 \beta 1$  expressed in ESCs instructs the differentiation to endothelial cells. *Stem Cells* 33, 1719–1729.
- Urao, N., Inomata, H., Razvi, M., Kim, H.W., Wary, K., McKinney, R., Fukai, T., and Ushio-Fukai, M. (2008). Role of nox2-based NADPH Oxidase in bone marrow and progenitor cell function involved in neovascularization induced by hindlimb ischemia. *Circ. Res.* 103, 212–220.
- De Val, S., and Black, B.L. (2010). Transcriptional control of endothelial cell development. *Dev. Cell* 16, 180–195.
- Wang, G.L., and Semenza, G.L. (1995). Purification and characterization of hypoxia-inducible factor 1. *J. Biol. Chem.* 270, 1230–1237.
- Wu, L., Wary, K.K., Revskoy, S., Gao, X., Tsang, K., Komarova, Y.A., Rehman, J., and Malik, A.B. (2015). Histone demethylases KDM4A and KDM4C regulate differentiation of embryonic stem cells to endothelial cells. *Stem Cell Reports* 5, 10–21.
- Wythe, J.D., Dang, L.T.H., Devine, W.P., Boudreau, E., Artap, S.T., He, D., Schachterle, W., Stainier, D.Y.R., Oettgen, P., Black, B.L., et al. (2013). ETS factors regulate Vegf-dependent arterial specification. *Dev. Cell* 26, 45–58.
- Yamashita, J., Itoh, H., Hirashima, M., Ogawa, M., Nishikawa, S., Yurugi, T., Naito, M., Nakao, K., and Nishikawa, S. (2000). Flk1-positive cells derived from embryonic stem cells serve as vascular progenitors. *Nature* 408, 92–96.
- You, L.-R., Lin, F.-J., Lee, C.T., DeMayo, F.J., Tsai, M.-J., and Tsai, S.Y. (2005). Suppression of Notch signalling by the COUP-TFII transcription factor regulates vein identity. *Nature* 435, 98–104.

**Stem Cell Reports, Volume 9**

**Supplemental Information**

**Embryonic Stem Cell Differentiation to Functional Arterial Endothelial  
Cells through Sequential Activation of ETV2 and NOTCH1 Signaling  
by HIF1 $\alpha$**

**Kit Man Tsang, James S. Hyun, Kwong Tai Cheng, Micaela Vargas, Dolly Mehta, Masuko  
Ushio-Fukai, Li Zou, Kostandin V. Pajcini, Jalees Rehman, and Asrar B. Malik**

## SUPPLEMENTAL INFORMATION

Figure S1

Analysis of glycolytic genes during hypoxic differentiation of mESC, Related to Figure 2

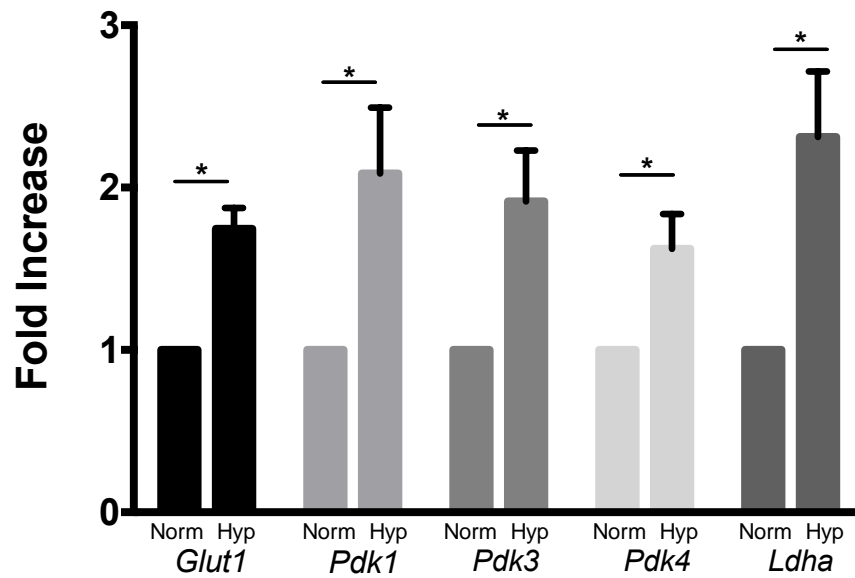

Figure S1 Related to Figure 2

qPCR analysis of Day7 cells undergoing normoxic and hypoxic endothelial cell differentiation. Expression of key glycolytic genes (Glucose Transporter1, Pyruvate Dehydrogenase1, Pyruvate Dehydrogenase3, Pyruvate Dehydrogenase4, Lactate Dehydrogenase A) were increased in hypoxic differentiation compared to normoxic differentiation. Results are representative of 3 independent biological replicates

Figure S2.

Levels of VE-cadherin during hypoxic differentiation of J1 and *Hif1a*<sup>-/-</sup> mESCs, Related to Figure 2

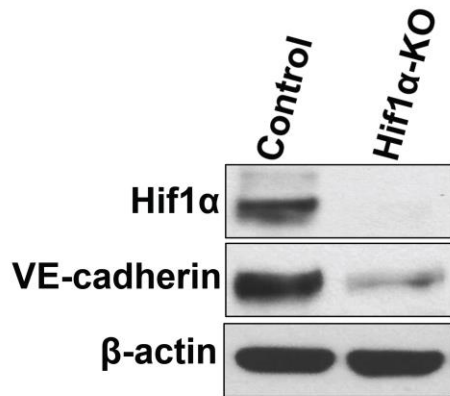

Figure S2 Related to Figure 2

HIF1 $\alpha$  deletion of mouse embryonic stem cells reduces VE-cadherin expression at Day7 of hypoxia mediated endothelial differentiation. Results are representative of 3 independent experiments.

**Figure S3.**

**Levels of HIF1 $\alpha$  during hypoxic differentiation of J1, *Hif1 $\alpha$ <sup>-/-</sup>*, and *Etv2<sup>-/-</sup>* mESCs, Related to Figure 2**

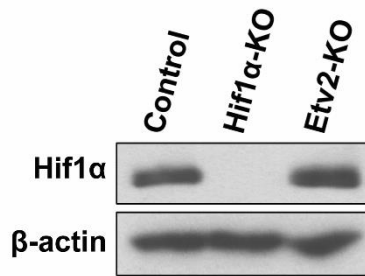

**Figure S3 Related to Figure 2**

Loss of *Etv2* in differentiating mESCs did not affect the expression of HIF1 $\alpha$ , demonstrating *Etv2* acted downstream of *Hif1 $\alpha$* . Results are representative of 3 independent experiments.

Figure S4.

Validation of *Pecam1* mESC reporter, Related to Figure 4

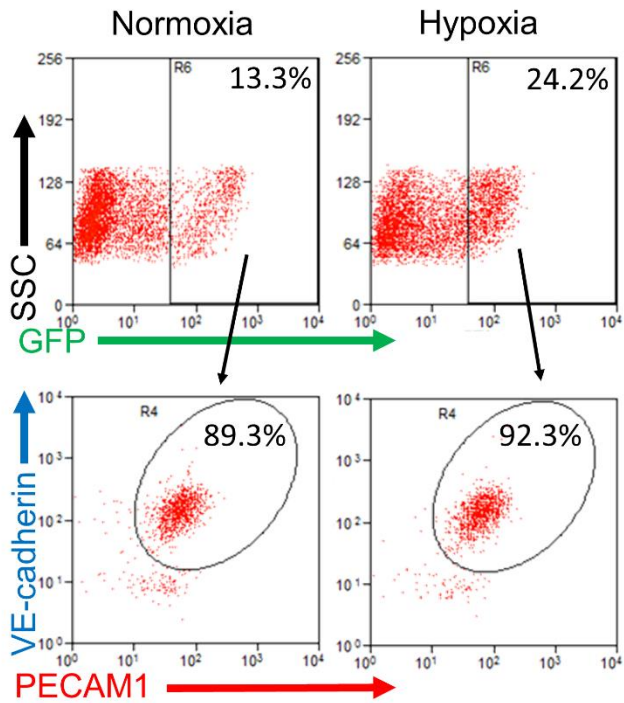

Figure S4 Related to Figure 4

*Pecam1*-GFP mESCs reporter were differentiated for 7days under normoxia and hypoxia then stained with PECAM1-APC and VE-cadherin-PE antibodies. ~90% GFP+ cells were positive for both PECAM1 and VE-cadherin, demonstrating that GFP+ cells were endothelial cells



**Table S1.****List of primers used for mRNA quantification in real-time PCR, Related to Figure 1, 2, and 3**

| Gene        | Primer Sequence 5'-3'                                                 |
|-------------|-----------------------------------------------------------------------|
| VE-cadherin | Forward: GGCCTAAGTGTGTCCTTGATTC<br>Reverse: TGGGTGAGAAGTATGGTGACTG    |
| Pecam1      | Forward: GAGCCCATTCACGTTTCAGTTT<br>Reverse: TCCTTCCTGCTTCTTGCTAGCT    |
| Erg         | Forward: ACCTCACCCCTCAGTCCAAA<br>Reverse: TGGTCGGTCCCAGGATCTG         |
| Etv1        | Forward: TTAAGTGCAGGCGTCTTCTTC<br>Reverse: GGAGGCCATGAAAAGCCAAA       |
| Etv2        | Forward: CAGAGTCCAGCATTACACCAC<br>Reverse: AGGAATTGCCACAGCTGAAT       |
| Ets1        | Forward: TCCTATCAGCTCGGAAGAACTC<br>Reverse: TCTTGCTTGATGGCAAAGTAGTC   |
| Ets2        | Forward: CCGTGCAGCAACAGTTTTCG<br>Reverse: TGGAGTGTCTGATCTTCACTGA      |
| Fli1        | Forward: ATGGACGGGACTATTAAGGAGG<br>Reverse: GAAGCAGTCATATCTGCCTTGG    |
| Elf2        | Forward: GTTCACAGCAGTAATGCTCACT<br>Reverse: TCAAGCAGGTAGGAGATTCCAT    |
| Elf3        | Forward: GCTGCCACCTGTGAGATCAG<br>Reverse: GTGCCAAAGGTAGTCGGAGG        |
| Elk4        | Forward: ATCTAACAAATGGGGAGTTCAAGC<br>Reverse: GGCTCGGCTGAGTTTATCATAAT |
| Tel         | Forward: AGCAGGAACGAATTTCATAACAG<br>Reverse: GGCAGGTGGATCGAGTCTTC     |
| EphrinB2    | Forward: ATTATTTGCCCCAAAGTGGACTC<br>Reverse: GCAGCGGGGTATTCTCCTTC     |
| Notch1      | Forward: CTCCGTTACATGCAGCAGTT<br>Reverse: CCAGGATCAGTGGAGTTGTG        |
| Dll4        | Forward: TTCCAGGCAACCTTCTCCGA<br>Reverse: ACTGCCGCTATTCTTGTCCTC       |
| CoupTFII    | Forward: ACCGGGTGGTCGCTTTTATG<br>Reverse: GGCCTTGAGGCAGCTATACTC       |
| 18S         | Forward: AGTTCCAGCACATTTTGCAG<br>Reverse: TCATCCTCCGTGAGTTCTCCA       |
| Slc2a1      | Forward: TGGCGGGAGACGCATAGTTA<br>Reverse: AACTCCTCAATAACCTTCTGGGG     |
| Pdk1        | Forward: GGGCCAGGTGGACTTCTATG<br>Reverse: TGGATATACCAACTTTGCACCAG     |
| Pdk3        | Forward: TTCAATGCCAAAGCGCCAAA<br>Reverse: AAGTGGGACTCCACCACCTA        |
| Pdk4        | Forward: AAACCGTCCTTCTTGACCC<br>Reverse: AAACCAGCCAAAGGGGCATT         |
| Ldha        | Forward: AACTTGGCGCTCTACTTGCT<br>Reverse: GGACTTTGAATCTTTTGAGACCTTG   |

## Detailed Methods

### ESC culture

Undifferentiated J1 mouse ESCs (mESCs) were cultured on mitomycin C (Sigma-Aldrich) treated mouse embryonic fibroblasts (MEFs) feeder layer in Dulbecco's modified Eagle's medium (DMEM) (Gibco) supplemented with 15% fetal bovine serum (FBS) (Invitrogen), glutamax (Invitrogen), non-essential amino acids (Invitrogen), penicillin/streptomycin (Invitrogen), 55mM 2-mercaptoethanol (Invitrogen) and 1000 U/ml leukemia inhibitory factor (LIF) (Millipore). Prior to endothelial differentiation, cells were passaged onto 0.1% gelatin coated plates using the same medium. MEFs were maintained in DMEM containing 10% fetal bovine serum (FBS). Undifferentiated H1 human ESCs (hESCs) were cultured on Matrigel-coated plates with Essential 8 medium (Gibco).

### Endothelial differentiation during hypoxia

To induce mESC differentiation towards the endothelial lineage, seven hundred cells/cm<sup>2</sup> of mESCs were seeded on collagen IV-coated plate in the absence of LIF and maintained in endothelial cell differentiation medium (ECDM) for 7 days either under normoxia (21% O<sub>2</sub>) or in a hypoxic chamber (Biospherix) calibrated to maintain low oxygen tension (1% O<sub>2</sub>, 5% CO<sub>2</sub>, and balanced with N<sub>2</sub>). ECDM medium contained 50% Iscove's Modified Dulbecco's Medium (Gibco), 50% Ham's F-12 medium (Gibco), supplemented with N2 (Gibco), B27 retinoic acid (Gibco), 0.05% lipid-rich bovine serum albumin (BSA) (Gibco), 50 ng/ml of ascorbic acid (Sigma) and 50 ng/ml of monothioglycerol (MTG) (Sigma), 50 ng/ml of human vascular endothelial growth factor (hVEGF), 10 ng/ml of human basic fibroblast growth factor (bFGF), and 2 ng/ml of human bone morphogenetic protein 4 (BMP4). This differentiation protocol generates functional endothelial cells which express endothelial transcription factors and endothelial-specific cell-surface markers VE-cadherin, form tubes *in vitro* and blood vessels *in vivo* (Toya et al., 2015).

To differentiate hESCs towards an endothelial lineage, ten thousand cells/cm<sup>2</sup> were seeded on matrigel-coated plate in Essential 8 medium and incubated for 24 hours (Day0) Next day (Day1), Essential 8 medium was replaced with human endothelial cell differentiation medium (50% Iscove's Modified Dulbecco's Medium (Gibco), 50% Ham's F-12 medium (Gibco), 1x Insulin-transferrin-selenium-X (Gibco), 1% Chemically defined lipid concentrate (Gibco), 5 mg/ml BSA (Sigma), 50 ng/ml ascorbic acid (Sigma) and 200μM 1-Thioglycerol (Sigma) supplemented with 25ng/ml Activin A (Stemgent), 10ng/ml BMP4 (R&D), 50ng/ml VEGF (PeproTech) and CHIR 1.5μM (Stemgent) and incubated for 3 days. At Day3, Day5 and Day7, medium was replaced with human serum free differentiation medium supplemented with 50ng/ml VEGF (PeproTech) and 10μM SB431542 (Stemgent). Differentiated cells at Day8 were collected for analysis by flow cytometry.

### Gene deletion studies with CRISPR/Cas9

Mouse ESCs were co-transfected with plasmids containing Cas9, Hif1α-specific gRNA (Santa Cruz) and GFP as well as homology-directed repaired (HDR) plasmids (Santa Cruz) containing homology arms corresponding to the cut sites generated by Hif1α-specific gRNA. HDR plasmids inserted a puromycin resistance gene to the sites targeted by the Hif1α-specific gRNA. Two days after transfection, GFP positive mESC were sorted and plated on feeder cells for 5 days. Resultant single mESC colonies were then picked and expanded under puromycin selection (1.8μg/ml). Hif1α protein expression of each clone was then assessed in hypoxia-exposed mESC.

A *Etv2*<sup>-/-</sup> and *Notch1*<sup>-/-</sup> mESC line was generated by co-transfecting px330 plasmid (Cong et al., 2013) containing gRNA specific to *Etv2* and *Notch1* and puromycin resistance containing plasmid. Following 7 days of puromycin selection single mESC colonies were then picked and expanded. Each *Etv2*<sup>-/-</sup> and *Notch1*<sup>-/-</sup> clone was subjected to EC differentiation and mRNA expression of was measured on Day3 for *Etv2* and Day 7 for *Notch1* to validate the successful knockout.

### Generation of *Pecam1*-GFP mESC reporter line

To track the fate of the injected cells *in vivo*, a mESC reporter line was generated using CRISPR/Cas9. Green fluorescence protein (GFP) was incorporated within the exon one of *Pecam1* gene; i.e. GFP expression is driven by endogenous *Pecam1* promoter. The sequence of gRNA used for targeting mouse *Pecam1* locus was 5' CAGCTGAGGTGGGCCTCAGT 3'

## **Chromatin immuno-precipitation (ChIP) assay**

ChIP was performed using a High-Sensitivity ChIP Kit (Abcam) per the manufacturer's instructions. mESC at day3 of endothelial differentiation were fixed with 1.5% formaldehyde (Sigma) for 10 minutes. Glycine was then added to a final concentration of 125mM to quench the excess formaldehyde. Cells were then collected and washed twice with PBS containing protease inhibitors. Washed cells were lysed with lysis buffer at cell density of one million cells/200 $\mu$ l. Chromatin pellets were then resuspended in ChIP buffer and subjected to chromatin shearing (Covaris S2) for 40s at 7°C to reach 500bp fragments. Two-micrograms of chromatin per each sample were used to bind in one Hif1 $\alpha$  antibody-coated well. Wash and elution steps were followed as described in the manufacturer's manual. Four microliter of resultant DNA were used for quantification by quantitative real-time PCR using primers (Forward 5' AAGGGACCATTCAGGGACC 3' and Reverse 5' GGGTCGCAGCCTGGGTCAA 3') detecting HRE-containing Etv2 promoter region.

## **Real-time PCR**

Total RNA was prepared using QIAshredder and RNeasy mini kit (Qiagen, Inc.) per manufacturer's instructions. RNA (1 $\mu$ g) was converted into cDNA using High-Capacity cDNA Reverse Transcription Kit (ABI). QPCR was performed by fast SYBR green PCR master mix (ABI) with specific primers (Table S1). Samples were run on a ViiA7 QPCR machine (Life Technologies).

## **FACS analysis**

Endothelial cells were quantified using FACS analysis. VE-cadherin and PECAM1 were used as positive markers to determine the differentiation of mESCs into ECs. Differentiated cells differentiation of mESCs were harvested with 0.05% trypsin-EDTA (Invitrogen) and incubated with anti-VE-cadherin at 1:200 (R&D Systems #AF1002) for one hour. Cells were then washed twice with 0.2%BSA in PBS buffer. Donkey anti-goat Alexa-fluor 488 (1:500) (Molecular Probe #A-11055) and APC-conjugated anti-PECAM1 (BD Biosciences#565509) were then incubated with the cells for 1hour. Normal Goat IgG (R&D Systems #AB108C) and APC-Rat IgG2a Kappa(BD Biosciences#564982) were used as negative controls for FACS gating. Labeled cells were analyzed by Cyan ADP flow cytometer (Beckman Coulter).

## **Cell Cycle Analysis**

BrdU labeling and flow cytometric quantification was used to determine the effect of hypoxia on the proliferation of mESCs undergoing endothelial differentiation. mESCs were collected on day 5 of endothelial differentiation and labeled using a BD Pharmingen APC BrdU Flow Kit per manufacturer's instructions. Flk1 (eBioscience #12-5821-82), a marker for vascular progenitors(Yamashita et al., 2000), was used to gate for early endothelial cells.

## **Immunofluorescence**

mESCs were differentiated on collagen IV-coated coverslips. At Days 3, 4 and 5 of differentiation, cells were fixed with 4% paraformaldehyde (PFA) for 30 minutes. Excess PFA was quenched with glycine for 10 minutes. Cells were then blocked with 10% donkey serum in 0.5%BSA/PBS buffer. The primary antibody against VE-cadherin (Santa Cruz Biotechnology #sc-9989) and Etv2 (Abcam #181847) was incubated with the cells for 1 hour. Following washing, donkey anti-goat Alexa-546 (Molecular Probes #A-11056) and donkey anti-rabbit Alexa-488 (Molecular Probes #A-11055) were added and incubated for 1 hour. Coverslips were mounted using ProLong® Gold Antifade Mountant containing DAPI (Molecular Probe #P36931). Images were acquired using a confocal microscope (Carl Zeiss LSM710).

## **Western blotting**

mESCs or differentiated cells were harvested on Day 0 (6-hour incubation after seeding), 3, 5, and 7 and lysed in RIPA lysis buffer (Santa Cruz) containing protease and phosphatase inhibitors (Santa Cruz). Protein concentrations were measured using Pierce™ BCA Protein Assay Kit (Thermo Scientific). Denatured protein (30 $\mu$ g) was resolved in SDS-PAGE and immunoblotted on PVDF membrane. Protein of interests were detected using primary antibodies against HIF1 $\alpha$  (Caymen Chemicals #10006421), HIF2 $\alpha$  (Novus Biologicals #NB100-122), VE-cadherin

(Santa Cruz #sc-9989), NOTCH1 (Cell Signaling#3603), cleaved NOTCH1 (Cell Signaling#4147), EPHRINB2 (R&D system #AF496), COUPTFII (Cell Signaling #6434) and  $\beta$ -actin (Abcam #ab8227).

### Mouse ischemia models

The *Pecam1*-driven GFP reporter mESC line was used to differentiate endothelial cell under hypoxic and normoxic conditions as described. At day 7 of endothelial differentiation, GFP<sup>+</sup> cells were sorted by FACS. For the mouse myocardial infarction (MI) model, ten to twelve-week old C57/BL6 mice were subjected to left thoracotomy after anesthetization with 1.5-3% isoflurane inhalation and Etomidate i.p. injection. Surgical anesthesia was maintained using 1% isoflurane delivered through mechanical ventilation. Ligation of the left main coronary artery was performed to induce infarction (Mavrommatis et al., 2013). Immediately after ligation,  $0.5 \times 10^6$  hypoxia-derived GFP<sup>+</sup> cells,  $0.5 \times 10^6$  normoxia-derived GFP<sup>+</sup> cells, or  $0.5 \times 10^6$  primary mouse adult endothelial cells (negative control) in or Matrigel alone (no cell control) were introduced by direct intramuscular injections into the peri-infarcted regions of the myocardium. For the mouse hind limb ischemia model, male athymic nude mice obtained from Jackson Laboratory at 8-9 weeks of age were subjected to unilateral hindlimb surgery under anesthesia with intraperitoneal administration of ketamine (87 mg/kg) and xylazine (13 mg/kg). We performed ligation and segmental resection of left femoral vessels followed by physiological and histological analysis as previously described with minor modifications (Urao et al., 2008). Briefly, the left femoral artery was exposed, ligated both proximally and distally using 6-0 silk sutures and the vessels between the ligatures was excised without damaging the femoral nerve. All arterial branches between the ligations were obliterated using an electrical coagulator (Fine Scientific Tools). ESC-derived ECs or mature ECs ( $1 \times 10^6$  cells/100ul) were injected into three different spots in gastrocnemius muscles right after ischemic surgery. Skin closure was done using 6-0 nylon sutures. The Animal Care and Use Committee of the University of Illinois at Chicago approved the study protocols. We measured ischemic (left)/nonischemic (right) limb blood flow ratio using a laser Doppler blood flow (LDBF) analyzer (PeriScan PIM 3 System; Perimed) as we described (Urao et al., 2008). Mice were anesthetized and placed on a heating plate at 37°C for 10 minutes to minimize temperature variation. Before and after surgery, LDBF analysis was performed in the plantar sole. Blood flow was displayed as changes in the laser frequency, represented by different color pixels, and mean LDBF values were expressed as the ratio of ischemic to non-ischemic LDBF.

### Immunohistochemistry and engraftment analysis

Infarcted heart and gastrocnemius (GC) muscles of ischemic hindlimbs were collected at Day21 and Day 28 post-surgery, respectively. Tissues were fixed in 4% paraformaldehyde for 24 hours and then were embedded in paraffin. Tissue slices with 5 $\mu$ m thickness were then obtained. To perform immunohistochemistry, slides were rehydrated and antigen retrieval was done with citrate buffer for 5 minutes. They were then blocked with 0.3% hydrogen peroxide (Sigma) for 20 minutes, followed by three 10 minute washes with PBS containing 0.05% Tween20 (Sigma). Tissue slices were blocked with 10% donkey serum in 2% BSA/PBS for 1 hour. GFP (Abcam#6556), PECAM1 (Abcam#28364), Ki67 (Abcam#15580) antibody was then incubated overnight at 4°C. After three 10 minute washes, donkey anti-rabbit was incubated for 1 hour. The slides were developed with DAB (Invitrogen) for 5 minutes and counterstained with hematoxylin (Sigma), followed by rinsing in running tap water for 10 minutes. Finally, the slides were dehydrated and mounted for imaging using Olympus BX51 microscope.

GFP, PECAM1, and Ki67 were stained on consecutive slices from infarcted hearts to visualize the location of GFP positive cells. Number of GFP cells in infarcted heart was counted from 3 animals and images of 6 fields were taken from each heart. Cell proliferation of transplanted cells were analyzed by quantifying the number of GFP<sup>+</sup> and Ki67<sup>+</sup> cells from 3 animals in 8 fields of view at 20X magnification on Day21. To quantify the vessels density, number of PECAM1<sup>+</sup> cells in GC muscles was counted from 3 animals and 8 fields were selected from each.

### Statistical analysis

All statistical analyses were performed with GraphPad Prism (San Diego). Results are expressed as mean  $\pm$  standard deviation (SD). The differences between groups were analyzed using ANOVA and Student *t*-test. *p* values less than 0.05 was considered as statistically significant.

### Supplemental References

Cong, L., Ran, F.A., Cox, D., Lin, S., Barretto, R., Hsu, P.D., Wu, X., Jiang, W., and Marraffini, L.A. (2013). Multiplex Genome Engineering Using CRISPR/VCas Systems. *Science* (80-. ). 339, 819–823.

Mavrommatis, E., Shioura, K.M., Los, T., and Goldspink, P.H. (2013). The E-domain region of mechano-growth factor inhibits cellular apoptosis and preserves cardiac function during myocardial infarction. *Mol. Cell. Biochem.* 381, 69–83.

Toya, S.P., Wary, K.K., Mittal, M., Li, F., Toth, P.T., Park, C., Rehman, J., and Malik, A.B. (2015). Integrin  $\alpha$ 6 $\beta$ 1 Expressed in ESCs Instructs the Differentiation to Endothelial Cells. *Stem Cells* 33, 1719–1729.

Urao, N., Inomata, H., Razvi, M., Kim, H.W., Wary, K., McKinney, R., Fukai, T., and Ushio-Fukai, M. (2008). Role of nox2-based NADPH Oxidase in bone marrow and progenitor cell function involved in neovascularization induced by hindlimb ischemia. *Circ. Res.* 103, 212–220.

Yamashita, J., Itoh, H., Hirashima, M., Ogawa, M., Nishikawa, S., Yurugi, T., Naito, M., Nakao, K., and Nishikawa, S. (2000). Flk1-positive cells derived from embryonic stem cells serve as vascular progenitors. *Nature* 408, 92–96.
